1 Diet-induced changes to host gut microbiota are linked to foraging innovation in a wild bird.

2 Authors: Gabrielle Davidson<sup>a,b,\*</sup>, Niamh Wiley<sup>c,d</sup>, Amy C. Cooke<sup>a</sup>, Crystal N. Johnson<sup>c,d</sup>, Fiona Fouhy<sup>c,d</sup>,  
3 Michael S. Reichert<sup>a,e</sup>, Ivan de la Hera<sup>a</sup>, Jodie M.S. Crane<sup>a,f</sup>, Ipek G. Kulahci<sup>a</sup>, R. Paul Ross<sup>c,d</sup>, Catherine  
4 Stanton<sup>c,d</sup>, John L. Quinn<sup>a,\*</sup>

5 \* Correspondence: Gabrielle Davidson email: [gd339@cam.ac.uk](mailto:gd339@cam.ac.uk); John Quinn email: [j.quinn@ucc.ie](mailto:j.quinn@ucc.ie).

6 Tel: +44(0)1223 747321

7 a. School of Biological, Earth and Environmental Sciences, Distillery Fields, North Mall,  
8 University College Cork, Cork, Ireland.

9 b. Department of Psychology, Downing Street, University of Cambridge, Cambridge, UK.

10 c. APC Microbiome Ireland, University College Cork, Cork, Ireland.

11 d. Teagasc Food Research Centre, Moorepark, Fermoy, Ireland.

12 e. Department of Integrative Biology, Oklahoma State University, USA

13 f. Kākāpō Recovery Programme, Department of Conservation, 7th Floor, 33 Don Street,  
14 Invercargill 9810, New Zealand.

15

16 ABSTRACT: Studies in lab rodents indicate diet alters host gut microbiome and that the gut  
17 microbiome influences behaviour. However, the ecological relevance across species and in wild  
18 animals is unclear. First we showed that problem solving performance in wild-caught great tits  
19 (*Parus major*) was weakly associated with natural variation in the gut microbiome. Then we  
20 experimentally manipulated the gut microbiome by feeding birds one of two different diets – an all  
21 insect diet or an all seed/nut diet. We presented these individuals with the problem solving task  
22 after the dietary manipulation to test whether the gut microbiome alterations influenced foraging  
23 innovativeness. Microbial communities changed substantially when given the insect, but not the  
24 seed diet. Individuals were less likely to problem-solve after being given the insect diet, and  
25 performance was positively associated with microbiome diversity. This is the first demonstration of  
26 an association between innovative problem solving and the gut microbiome in a wild animal.

27 Keywords: gut microbiome, gut-brain axis, diet, innovation, problem solving performance, great tits,  
28 foraging, cognition

29

## 30 INTRODUCTION

31 The enteric microbial community, frequently referred to as the gut microbiome, is an important  
32 ecosystem that contributes to host behaviour (Cryan & Dinan 2012; Sherwin *et al.* 2019). Recent  
33 evidence has pointed to a bidirectional communication link between host brain and the gut  
34 microbiome known as the gut-brain axis (e.g. Diaz Heijtz *et al.* 2011; Foster & McVey Neufeld 2013).  
35 Experimental alteration to the gut microbiome can impact on a suite of behavioural and cognitive  
36 phenotypes including learning, memory, anxiety, activity levels and social interactions (Clarke *et al.*

37 2012;Diaz Heijtz *et al.* 2011;Desbonnet *et al.* 2014;Hoban *et al.* 2017;Magnusson *et al.* 2015), as well  
38 as cause changes to neurogenesis (Ogbonnaya *et al.* 2015) and protein expression in the brain  
39 (Clarke *et al.* 2012;Gareau *et al.* 2011;Hoban *et al.* 2017). Neurotransmitters and short chain fatty  
40 acids released by microbes act as signals that can be communicated to the brain (reviewed in Cryan  
41 & Dinan 2012). Therefore, the extent to which signalling occurs is dependent on the microbial taxa  
42 present and their metabolic functions (Stilling *et al.* 2016). Evidence of the gut-brain axis is limited to  
43 experimental manipulations with model animals in the lab and correlational studies on mental  
44 health in humans (e.g. reviewed in Cryan & Dinan 2012;Foster & McVey Neufeld 2013). However,  
45 nothing is known about whether these findings can be applied to wild animals where we predict  
46 microbiome-host interactions to have important effects on traits that directly impact animal fitness,  
47 such as cognition (Morand-Ferron *et al.* 2016) and foraging behaviour (Stephens & Krebs 1986). We  
48 hypothesised that relationships between microbiome, diet and foraging behaviour are likely to be bi-  
49 directional if foraging determines diet, and if diet impacts on the same microbes/microbial  
50 community structures that are involved in altering host behaviour via the gut-brain axis.

51 Several environmental factors contribute to enteric microbial community composition in  
52 vertebrates, including geographical location (e.g. children, De Filippo *et al.* 2010; birds, Gillingham *et al.*  
53 *et al.* 2019), habitat characteristics (e.g. amphibians, Costa *et al.* 2016;birds, Knutie *et al.* 2019) and  
54 seasonality (e.g. mammals, Amato *et al.* 2015;Hicks *et al.* 2018;Maurice *et al.* 2015). These temporal  
55 and spatial differences in microbiome between and within populations are most frequently  
56 attributed to variation in diet (e.g. Amato *et al.* 2015; reviewed in Lozupone *et al.* 2012). From an  
57 evolutionary perspective, host diet strongly predicts phylogenetic convergence of the gut  
58 microbiomes in several vertebrate clades (Youngblut *et al.* 2019), including humans (Muegge *et al.*  
59 2011), mammals (Ley *et al.* 2008), fish (Sullam *et al.* 2012), and birds (Hird *et al.* 2015;Youngblut *et al.*  
60 *et al.* 2019; but see Kropackova *et al.* 2017). Diet has also been shown to alter gut microbes in chickens  
61 (reviewed in Pan & Yu 2014), humans and lab rodents (reviewed in Singh *et al.* 2017). Significant  
62 alterations can occur within 24 hours of the introduction of a new dietary regime (David *et al.* 2014),  
63 dependent on dietary features such as the ratio of protein (Clarke *et al.* 2014;David *et al.* 2014), fat  
64 (Fava *et al.* 2013), and plants present in a diet (Wu *et al.* 2016;Zimmer *et al.* 2012). Therefore, we  
65 expect the effect of diet on the microbiome to be particularly important in wild animals that are  
66 subject to variations in food availability (e.g. Amato *et al.* 2015), and where individuals differ in their  
67 foraging success (Davidson *et al.* 2018).

68 Diet-related changes to the microbiome have been linked to changes in host cognition and  
69 behaviour. For example, mice fed beef-chow had a higher microbial diversity than those fed on  
70 normal chow, and showed improved working and reference memory (Li *et al.* 2009). Moreover, high  
71 fat and high sugar diets caused differential changes to gut microbial taxonomic groups in mice.  
72 Compared to control animals on calorie balanced chow, both diets resulted in poorer behavioural  
73 flexibility on a reversal learning task, but only the high sugar diet impacted on spatial memory  
74 (Magnusson *et al.* 2015). These studies show, at least in model lab organisms, phenotypic plasticity  
75 in cognitive performance can occur in parallel with gut microbiome alterations. Observational  
76 studies also point to a relationship between diet, cognition and mood in humans (Psaltopoulou *et al.*  
77 2013), effects that may be mediated by the host gut microbiome (e.g. Carlson *et al.* 2018). There is  
78 an increasing need for manipulative experiments in natural populations to understand the ecological  
79 and evolutionary significance of how diet affects microbiome and how microbiome affects

80 behaviours that have the potential to have direct impacts on food acquisition, such as foraging  
81 abilities.

82 Foraging innovations refer to instances where animals generate novel solutions to problems, or  
83 incorporate a novel food type into their diet (Reader & Laland 2003). Foraging generalists with wide  
84 ecological niches have larger brains and are more successful at adapting to changing habitats than  
85 specialist species because of their propensity to innovate (Sol *et al.* 2005). As a consequence,  
86 innovators may increase their access to a wide range of resources (Ducatez *et al.* 2015; Reader &  
87 MacDonald 2003; but see Overington *et al.* 2011). If innovators have a wider dietary breadth, then  
88 we predicted that they would have a more diverse gut microbiome than non-innovators (Davidson *et*  
89 *al.* 2018). Given that the microbiome can also affect behaviour directly, the direction of causality  
90 between innovative foraging behaviour and the gut microbiome can thus be in either direction.

91 We manipulated the diet of wild great tits (*Parus major*) temporarily brought into captivity to  
92 examine whether diet affected the gut microbiome and innovative problem solving performance.  
93 We also tested whether specific gut microbiome profiles correlated with innovative problem solving  
94 as further evidence for behaviour-gut microbiome associations. Great tits differ in dietary  
95 specialisations and preferences (Serrano-Davies *et al.* 2017; Pagani-Nunez *et al.* 2015) and are found  
96 in both rural and urban habitat types – factors that may influence diet. They are also opportunistic  
97 foragers that vary individually in their problem solving performance, which is a common measure of  
98 innovativeness (Cole *et al.* 2011). Individual problem solving performance has been reported to be  
99 consistent across time and tasks in this species (Cole *et al.* 2011), and while this suggests the  
100 potential for heritability, little or no genetic variation explained problem solving performance (Quinn  
101 *et al.* 2016). Instead, other ecological conditions during the nestling stage, including habitat  
102 characteristics that could be linked to diet, were a more important predictor of adult problem  
103 solving performance (Quinn *et al.* 2016). Therefore, the evidence from, at least one population,  
104 suggests that problem solving is primarily a plastic trait in response to environmental inputs. A  
105 prospective mechanistic explanation for plasticity in problem solving could include diet-induced  
106 changes to the gut microbiome that affect gut-brain axis communication. Here

## 107 METHODS

### 108 Subjects

109 Thirty six great tits were captured between January and March 2017 across four sites. Two sites  
110 were within Cork city (urban), 1.6 km apart, and two were in deciduous woodlands (rural) 23 km  
111 apart, and located at least 23km from the urban sites. All birds were banded with rings issued by the  
112 British Trust of Ornithology for individual identification. Upon capture, birds were transported to the  
113 aviary facilities at University College Cork and singly-housed in wire cages (45 × 50 × 60 cm)  
114 containing two wooden perches.

### 115 Faecal sampling

116 Faecal samples were collected within 1 hour of arrival into the aviary, and again on Day 12 of  
117 captivity. A clean sheet of brown paper was placed on the floor of each cage for faecal collection.  
118 Paper was used in order to soak liquid urea away from the faecal matter as urea can act as a  
119 downstream inhibitor to amplification (Khan *et al.* 1991). Using sterile inoculation loops, we

120 transferred the faecal matter into tubes containing 1ml of 100% ethanol and stored tubes at -20  
121 degrees Celsius.

#### 122 Dietary manipulation

123 From day 2-13 of captivity, birds were given one of two different dietary treatments designed to  
124 reflect real ecological variation seen in the wild, for example changes in the availability of seed or  
125 animal food sources (Perrins 1991;Vel'ky *et al.* 2011), or perhaps reflecting potential individual  
126 differences in dietary specialisations (Serrano-Davies *et al.* 2017): 1) seed and suet, n = 17; and 2)  
127 Insect diet, n = 19. The insect diet consisted of wax moth larvae (*Achroia grisella*) and mealworm  
128 larvae (*Tenebrio molitor*). Mealworms were provided ad libitum, and five wax worms were provided  
129 each morning and each evening (except during the problem solving task). The seed diet consisted of  
130 sunflower hearts, peanuts and suet. We provided birds in the seed diet five mealworms and one wax  
131 worm on day seven of captivity for welfare reasons to ensure the dietary treatment was not too  
132 extreme. Nutritional composition of each food item is provided in Supplementary Table 1. To limit  
133 more general nutritional deficiencies, all birds received vitamin powder mixed with their food and  
134 drops mixed in their water (AviMix®). Birds were assigned to treatment groups randomly,  
135 counterbalanced for age and sex.

#### 136 Problem solving assay

137 To quantify individual foraging innovation, naïve birds were presented with a novel problem solving  
138 foraging task. This was derived from a similar foraging task, performance in which was consistent  
139 within individuals over their lifetimes, correlated with a range of environmental sources of variation,  
140 and was linked to behaviour and fitness-related traits (Dunn *et al.* 2011;Cole *et al.* 2012;Quinn *et al.*  
141 2016) *et al.*; Cole *et al.*; Quinn *et al.* Phil Trans). The birds were given the task overnight from one  
142 hour before sunset to two hours after sunrise, once on Day 1 of captivity and once on Day 12 of  
143 captivity. Due to the length of the trial, birds were not food deprived for welfare reasons. During the  
144 first trial, all birds had access to mealworms, peanuts and sunflower hearts ad libitum. During the  
145 second trial, birds had access to their assigned diets ad libitum. During both trials, wax worms, a  
146 highly preferred food reward (Cole *et al.* 2011;O'Shea *et al.* 2017; G. Davidson personal observation),  
147 were placed inside a transparent Perspex tube 16cm (height) x 5cm (width). The worms could be  
148 accessed by solving at least one of three solutions: 1) by pulling a lever to drop a platform holding a  
149 worm; 2) by pushing a door to the side; and 3) by pulling a string attached to one of the worms from  
150 the top of the tube. By having multiple access possibilities, problem solving performance could be  
151 assessed without limiting solutions to one particular motor action that may be more feasible in some  
152 individuals over others. At the start of the problem solving assay, a freely available wax worm was  
153 placed outside, at the base of the problem solving device to measure birds' motivation to approach  
154 the apparatus and consume the wax worm. Wax worms were otherwise not provided when the  
155 problem solving task was presented. One bird died of unknown causes following 10 days of captivity  
156 and therefore only data from Day 1 were included for this bird.

#### 157 Microbiome analysis

158 DNA extraction and amplification: Microbial DNA was extracted using the Qiagen QIAamp DNA Stool  
159 Kit, following the "Isolation of DNA from Stool for Pathogen Detection" protocol with modifications  
160 described in Zeale *et al.* (2011) to increase DNA yield and remove excess inhibitors expected to be

161 present in the uric acid of bird faeces (but see Crouch *et al.* 2019 where they found no evidence of  
162 uric acid in faecal matter from a subset of avian species). A 0.10 - 0.20 g aliquot of each faecal  
163 sample was added to the kit, alongside a negative control.

164 The V3-V4 variable region of the 16S rRNA gene was amplified from the DNA extracts using the 16S  
165 metagenomic sequencing library protocol (Illumina) as described in Fouhy *et al.* (2019). In the current  
166 study, each PCR reaction contained 23 µl DNA template, 1 µl forward primer (10 µM), 1 µl reverse  
167 primer (10 µM) and 25 µl 2X Kapa HiFi Hotstart ready mix (Roche, Ireland), to a final volume of 50 µl.  
168 Two negative controls were run in parallel – one from the DNA extraction and one containing PCR  
169 water instead of DNA template. Of the bird samples, ten failed to amplify and were not pooled for  
170 sequencing (Day 1: n = 1 (seed), Day 13: n = 3 (seed), 6 (insect)). Successful PCR products were  
171 cleaned using AMPure XP magnetic bead based purification (Labplan, Dublin, Ireland). Samples were  
172 sequenced at the Teagasc Sequencing Centre on the MiSeq sequencing platform, using a 2 x 300  
173 cycle kit, following standard Illumina sequencing protocols.

174 Three hundred base pair paired-end reads were assembled using FLASH (FLASH: fast length  
175 adjustment of short reads to improve genome assemblies). Further processing of paired-end reads  
176 including quality filtering based on a quality score of > 25 and removal of mismatched barcodes and  
177 sequences below length thresholds was completed using QIIME. Denoising, chimera detection and  
178 clustering into operational taxonomic units (OTUs) (97% identity) were performed using USEARCH v7  
179 (64-bit). OTUs were aligned using PyNASt (PyNASt: python nearest alignment space termination; a  
180 flexible tool for aligning sequences to a template alignment) and taxonomy was assigned using  
181 BLAST against the SILVA SSURef database release v123. Alpha diversities were generated in QIIME 4.

## 182 Statistical analyses

183 The QIIME files (Operational Taxonomic Unit table, taxonomic table, phylogenetic tree file) and  
184 metadata files were analysed using phyloseq (McMurdie & Holmes 2013) in R Statistical Software (R  
185 Development Core Team 2011). Sequences with less than 15,000 reads, singletons and taxa present  
186 at <0.005% were removed (Bokulich *et al.* 2013). Samples were CSS normalised for beta diversity  
187 analysis. We included all taxa in the dataset, most notably those that are often viewed as 'dietary  
188 contaminants' (i.e. microbes originating from ingested food, such as cyanobacteria present in  
189 plants). This is because not all cyanobacteria are dietary contaminants (Di Rienzi *et al.* 2013) and  
190 because our study specifically tested differences between diets. Thereby removal of one so-called  
191 'dietary contaminant' specific to plants (i.e. cyanobacteria), but none specific to insects (e.g. insect  
192 microbiome) could systematically bias our results.

193 Linear Mixed Models (LMMs) and Generalized Linear Mixed Models (GLMMs) were run using lme4  
194 (Bates *et al.* 2014), and where relevant, p-values were obtained using lmerTest (Kuznetsova *et al.*  
195 2017) in R (R Development Core Team 2011). Terms with p < 0.1 were sequentially removed from  
196 the models, starting with interaction terms. Site ID and Bird ID were included as random effects.  
197 Response variables were transformed where necessary to meet assumptions of normality (Natural  
198 log (Ln) or square root transformed), and therefore all models were run with a Gaussian distribution  
199 unless stated otherwise.

## 200 *Dietary effects on microbiome*

201 The effect of diet on the relative abundance (i.e. percentage abundance relative to all other phyla)  
202 was tested for Firmicutes, Proteobacteria, Bacteroidetes, Tenericutes and Actinobacteria as these  
203 were the most abundant phyla. Proteobacteria was modelled as a proportion and run with a  
204 binomial distribution, as it could not be transformed to fit a normal distribution. Three different  
205 measures of alpha diversity were used as response variables to test the effect of diet on the  
206 microbiome community: Shannon's index, total observed species, and Chao1. The above gut  
207 microbiome metrics did not differ between pre-assigned dietary groups, therefore we used diet as a  
208 three level factor accounting for both experimental date as a fixed effect: Diet (pre-dietary  
209 assignment (day 1), insect post-diet (day 12) and seed post-diet (day12)). Habitat (rural, urban), age  
210 (juvenile, adult (Svensson 1992)) and sex were included as fixed effects. To avoid  
211 overparameterization of models, we tested the interaction between diet and habitat only, as we  
212 expected inherent differences in diets between birds from the two habitats. We also investigated  
213 the effect of diet on genus-level relative abundance with mixed regression models using the web-  
214 based software Calypso (version 8.72) (Zakrzewski *et al.* 2017). ID was included as a random term  
215 and significant taxa were adjusted by a false discovery rate (FDR) whereby p values of less than 0.05  
216 were considered statistically significant.

#### 217 *Dietary effects on problem solving performance*

218 Problem solving performance was modelled as a binomial distribution (solved vs not solved) with  
219 diet (seed, insect), experiment day (day 1, day 12), habitat (rural, urban), age (juvenile, adult) and  
220 sex included as fixed effects. We included interactions between diet and habitat type and diet and  
221 experiment day. To test whether diet affected motivation, we ran a binomial GLMM with  
222 consumption of the freely available wax worm (Yes/No) as the response variable, assuming that  
223 birds who took the waxworm were more motivated to solve than those who were not. The fixed and  
224 random effects were included as described for the problem solving analysis above.

#### 225 *Relationship between problem solving and microbiome*

226 We tested whether natural variation in the gut microbiome correlated with problem solving  
227 performance on Day 1. We tested for associations between microbial community and problem  
228 solving as a binomial response variable (solved vs not solved) in GLMMs for each microbial  
229 community measurement (the top five phyla, and the three measures of alpha diversity), and  
230 included habitat, sex and age as fixed effects and site as a random effect. Beta Diversity was  
231 calculated in four ways: Bray-Curtis, Jaccard, weighted (accounting for relative abundance of taxa)  
232 and unweighted (presence/absence of taxa) unifracs distance matrices. Each matrix was analysed  
233 using permutational multivariate analysis of variance (ADONIS) with 1000 permutations. We also  
234 investigated the relationship between problem solving and relative abundance at the genus-level as  
235 described above.

236 To test whether gut microbiome alteration as a consequence of dietary manipulation caused a  
237 change in problem solving performance, we ran the same analyses described above, but included  
238 data from Day 12 and diet as a fixed effect with bird ID as a random term. We predicted that a  
239 change in problem solving performance should specifically be associated with the same metrics of  
240 the gut microbiome that were changed as a result of experimental diet manipulation.

241 Research and Animal Ethics: This study was conducted under licences from the Health Products  
242 Regulatory Authority (AE19130\_P017), The National Parks and Wildlife Services (C11/2017) and the  
243 British Trust for Ornithology, and permission from Coillte Forestry and private landowners. The  
244 research project received ethical approval from the Animal Welfare Body at University College Cork,  
245 and was in accordance with the ASAB (Association for the Study of Animal Behaviour) Guidelines for  
246 the Treatment of Animals in Behavioural Research and Teaching.

## 247 RESULTS

### 248 *Relative abundance, diet and microbial diversity*

249 The most prominent phyla across all samples were as follows (mean percentage relative abundance  
250  $\pm$ SE): Proteobacteria (55.3% $\pm$ 4.0); Cyanobacteria (14.8% $\pm$ 2.6); Firmicutes (10.2% $\pm$ 2.1); Tenericutes  
251 (9.0% $\pm$ 2.3); Actinobacteria (4.0% $\pm$ 1) and Bacteroidetes (2.0% $\pm$ 0.5). Proteobacteria increased  
252 significantly over the course of captivity in the insect-diet group ( $z = 2.02$ ,  $p = 0.04$ ), but not in the  
253 seed-diet group ( $z = -0.28$ ,  $p = 0.78$ ), and tended to be higher in adults than juveniles ( $z = 1.84$ ,  $p =$   
254  $0.07$ ). Bacteroidetes (natural log (Ln)-transformed) increased in the insect group ( $t = 0.22$ ,  $p = 0.03$ ),  
255 but not the seed group ( $t = 1.01$ ,  $p = 0.32$ ), and tended to be higher in urban compared to rural  
256 habitats ( $t = 1.80$ ,  $p = 0.08$ ). Actinobacteria was significantly higher in birds from urban habitats ( $t =$   
257  $2.47$ ,  $p = 0.02$ ) There was no significant effect of diet, habitat, sex or age on Firmicutes (Ln-  
258 transformed) or Tenericutes (Ln-transformed). There were no significant interactions between diet  
259 and habitat for all models. Figures 1 and 2 display relative abundance across treatments and across  
260 individual samples. Full model outputs are provided in Table S2, supplementary.

261  
262 Significant differences in genus-level abundance attributed to dietary treatments were found for 22  
263 genera. Bird given the insect diet showed a decrease in *Devosia*, *Rickettsiella*, *Sphingomonas*,  
264 *Pantoea*, *Arthrobacter*, *Brevibacterium*, *Brachybacterium*, *Clostridium* and *Carnobacterium*, and an  
265 increase in *Candidatus*, *Methylobacterium*. Birds given the seed diet showed a decrease in  
266 *Cronobacter* and *Serratia*, and an increase in *Microbacterium*. Birds in both dietary groups showed a  
267 decrease in *Bradyrhizobium*, *Staphylococcus* and *Rahnella*, and an increase in *Lactobacillus*, *Bacillus*,  
268 *Ureaplasma*, *Delftia*, *Flavobacterium*, *Streptococcus* and *Rhodococcus* (Table S3, supplementary).

269  
270 There was a significant decrease in Chao1 (square root transformed) in the insect diet group ( $t = -$   
271  $2.51$ ,  $p = 0.02$ ), but not in the seed group ( $t = -0.07$ ,  $p = 0.94$ ) compared to the pre-diet assignment  
272 birds (Figure 3a). Shannon's index also decreased in the insect group ( $t = -2.02$ ,  $p = 0.06$ ) but not the  
273 seed group ( $t = 0.01$ ,  $p = 0.99$ ), but this was marginally non-significant (Figure 3b). Number of  
274 observed species (Ln-transformed) did not differ significantly across treatments (insect group  $t = -$   
275  $1.74$ ,  $p = 0.10$ ; seed group  $t = 0.43$ ,  $p = 0.67$ ) (Figure 3c). There was no significant effect of sex, age, or  
276 habitat type on alpha diversity. There was no significant interaction between diet and habitat. (Table  
277 S2, supplementary).

### 278 *Problem solving, diet and microbial diversity*

279 The innovation task was solved 17 times, by 15 different individuals across both trial days. None of  
280 the birds from the insect group solved during the post-dietary treatment. Natural variation in beta  
281 diversity prior to dietary manipulation tended to be associated with problem solving performance  
282 (PSP) (unweighted unfrac distances  $R = 0.05$ ,  $p = 0.07$ ). All other metrics of natural variation in the  
283 gut microbiome were not significantly associated with problem solving (Table S4). However, PSP  
284 across both trials, when controlling for dietary treatment and repeated measures, was positively

285 correlated with alpha diversity (Shannon:  $z=2.22$ ,  $p = 0.03$ ; Chao1  $z = 2.13$ ,  $p = 0.04$ , observed species  
286  $z = 1.96$ ;  $p = 0.06$ ) (Figure 5a,b,c). Phylum-level and genus-level relative abundance was not  
287 associated with PSP.

288 Birds assigned to the seed group solved more than the birds assigned to the insect group ( $z = 2.22$ ,  $p$   
289  $= 0.03$ ), and birds tended to be more likely to solve on day 1 than day 12 ( $z = 1.93$ ,  $p = 0.054$ ), though  
290 this effect was likely driven by the post-diet insect group (Figure 4). There was a tendency for  
291 juveniles to solve more than adults ( $z = 1.94$ ,  $p = 0.053$ ). Neither the interactions between habitat,  
292 nor between experiment day and diet were significant (Table S2, supplementary). Diet and  
293 experiment day did not influence whether birds consumed the freely available wax worm (diet  $z =$   
294  $1.18$ ,  $p = 0.24$ , experiment day  $z = 0.85$ ,  $p = 0.40$ )

295 Beta diversity: ADONIS tests showed dietary treatment significantly influenced beta diversity across  
296 all four metrics. Post-hoc test with Bonferroni correction indicate that the differences were between  
297 day 1 and the post-diet insect group ( $R^2=0.07$ ,  $p<0.01$ ), and between the two post-diet groups  
298 ( $R^2=0.10$ ,  $p=0.03$ ). PSP and habitat were significantly different for some beta diversity metrics (Table  
299 S5). Differences in diet across experiment days, and differences in PSP can be visualised in  
300 Nonmetric Multidimensional Scaling (NMDS) ordination plots (Figure 6).

## 301 DISCUSSION

302 We demonstrate that an experimentally induced dietary change caused significant alterations to the  
303 gut microbiome diversity and phylum- and genus-level abundance in a wild bird species, which in  
304 turn may have led to reduced innovative behaviour. To our knowledge, this is the first study  
305 providing evidence that microbial communities in the gut may be in part determined by foraging  
306 innovations, and that there is an effect of gut gross microbiota composition on problem solving  
307 performance. We discuss these findings in the context of foraging ecology, the gut-brain axis, and  
308 environment-behaviour interactions.

309 Dietary manipulation in this experiment affected both the likelihood of solving and the gut  
310 microbiome. Specifically, those on the insect-only diet had reduced microbiome diversity and were  
311 less likely to solve, suggesting that the dietary induced reduction in the microbiome reduced  
312 innovative problem solving behaviour. Moreover, our results suggest that individual variation in  
313 problem solving performance was associated with natural variation in microbial beta diversity,  
314 although this result was marginally non-significant. This supports our hypothesis that innovators  
315 who are expected to have a more diverse diet should consequently also have a more diverse  
316 microbiome. This was nonetheless correlational, so the alternative causal direction cannot be  
317 discounted. Nevertheless, together our findings lend support to the hypothesis that the gut  
318 microbiome, innovation and diet are interlinked. We encourage further manipulative investigations  
319 to pinpoint causal directions of these relationships, in particular whether innovative behaviour leads  
320 to variation in microbial diversity through food access, or indeed whether innovation arises because  
321 of microbial diversity caused by some other mechanism.

322 Seasonal and geographic differences in gut microbial communities in wild mammals have been  
323 attributed to changes in food availability (Amato *et al.* 2015; Maurice *et al.* 2015; Hicks *et al.* 2018). In  
324 a population of wild birds temporarily taken into captivity, we show that changes in microbial  
325 community composition can be sensitive to dietary changes, independent of other factors that may



326 differ with seasonality and impact on gut microbiota, such as hormonal differences (Escallon *et al.*  
327 2019), because the changes here were recorded under controlled conditions over a two week  
328 period. We show that phylum-level, genus-level and diversity changes to the gut microbiome are  
329 dependent on the food type. While birds in both the seed and insect diets showed both decreases  
330 and increases in genus-level abundance, only birds given the insect diet showed significant changes  
331 in diversity and phylum-level abundance. This could perhaps be explained because our birds had  
332 already been taking seeds at the feeders we used to lure them for capture, and because great tits  
333 consume a high proportion of plant-based foods in the winter (Vel'ky *et al.* 2011). The use of garden  
334 feeders in both urban and rural environments may also explain why there were no rural versus  
335 urban habitat differences in alpha diversity. Nevertheless, there was a significant difference in beta  
336 diversity as well as a higher proportion of Actinobacteria in urban birds compared to rural birds,  
337 similar metrics to those that have previously been shown to be related to urban environments in  
338 house sparrows (*Passer domesticus*) (Teyssier *et al.* 2018). While our study aimed to mimic variation  
339 in individual food consumption, or changes during the course of the winter, longitudinal sampling of  
340 individuals across seasons would be necessary to confirm whether similar microbial taxa changes  
341 would occur, particularly given that the invertebrate species accessible in the wild would differ from  
342 those provided in our experiment.

343 Problem solving performance dropped significantly in birds that were given an insect diet, which also  
344 caused alterations to gut microbiome profile, suggesting a potential causal link between microbiome  
345 and behaviour via the gut-brain axis. We acknowledge that motivation can influence problem solving  
346 performance (reviewed in Griffin & Guez 2014), and that an all-insect diet may have decreased  
347 motivation to engage in the problem solving task baited with an insect reward, even if of a preferred  
348 species, the waxmoth. However, the insect diet did not influence the birds' motivation to consume  
349 the freely available wax worm, and the same birds solved on day one when mealworms were freely  
350 available, indicating that wax worms are a highly-valued and preferred food reward, irrespective of  
351 dietary treatment during captivity. Our results showed that the indices of microbial community  
352 diversity that decreased as a consequence of diet (i.e. Chao1 index, beta diversity) were the same  
353 metrics that were associated with variation in problem solving performance. Proteobacteria and  
354 Bacteroidetes increased following an insect-diet, but these two phyla were not associated with  
355 problem solving performance, nor were the genus-level microbial taxa that were altered as a  
356 consequence of diet, suggesting that the microbial community structure as a whole may be  
357 important for regulating behaviour.

358 How the gut microbiome impacts behaviour via the gut-brain axis may be attributed to the  
359 metabolic functions of the microbial community (e.g. Stilling *et al.* 2016), derived from the diets of  
360 the host (e.g. reviewed in Roager & Dragsted 2019). Studies have attempted to disentangle  
361 nutritional and microbial effects on behaviour by depleting the original microbes of the hosts and re-  
362 introducing specific bacterial organisms, or transplanting gut microbiomes between hosts (e.g.  
363 Bruce-Keller *et al.* 2015; Mohle *et al.* 2016). However, the aim of our study was to test diet-  
364 microbiome-behaviour relationships within an ecologically relevant context that would translate to  
365 wild animals in their natural environment. To control for nutritional deficiencies that may have an  
366 impact on behaviour independent of microbiome, we provided vitamin supplements; however,  
367 other nutritional differences were present. Fat content and fibre content was five-fold and three-  
368 fold higher in the seed diet compared to the insect diet, respectively. Mice fed on high fat diets, or  
369 given microbiome transplantations from obese donors show poorer cognitive performance than

370 control mice (Magnusson *et al.* 2015; Bruce-Keller *et al.* 2015); whereas, our study showed that birds  
371 fed the lower-fat diet (i.e. insect) had poorer problem solving performance. Having a higher  
372 proportion of fibre present in the seed diet may have offset any negative effects of a high-fat diet.  
373 Non-digestible carbohydrates are fermented by gut microbes in the large intestines, promote the  
374 growth of microbial organisms and can have positive effects on cognition and behaviour in mammals  
375 (reviewed in Cryan *et al.* 2019). Metabolomics profiling would be an informative future endeavour to  
376 provide a functional assessment of microbial products such as short chain fatty acids involved in gut-  
377 brain axis communication (reviewed in Stilling *et al.* 2016; Heintz-Buschart & Wilmes 2018; Cryan *et al.*  
378 *et al.* 2019).

#### 379 CONCLUSIONS:

380 We have shown phenotypic plasticity in innovative behaviour as a consequence of diet-related  
381 changes to the gut microbiome, demonstrating an association with foraging behaviour in wild  
382 animals. Moreover, food consumption determined the gut microbiome, indicating that problem  
383 solving performance, diet and the gut microbiome are intercorrelated, and that problem solving  
384 performance is a trait that is largely influenced by environmental inputs. We have established a  
385 novel approach for investigating causes and consequences of innovative foraging, which provides  
386 the groundwork for further investigations into the ecological relevance of host-microbiome  
387 relationships in natural systems.

388 Authors contributions: GLD, ACC and JLQ designed the experiment with input from CS and RPR. GLD  
389 and ACC ran the experiment with assistance from MSR, IGK, IDH and JMSC. GLD, NW and CNJ carried  
390 out DNA extraction and library prep. FF and GLD analysed data. GLD wrote the manuscript with input  
391 from all authors. All authors gave final approval for publication.

392 Acknowledgements: James Nichols, Ally Phillimore and Sarah Knowles for helpful discussions on  
393 molecular methodology; Shane Somers for advice on statistics; Jennifer Coomes for assistance with  
394 fieldwork; Dr. Paul Cotter, Dr. Fiona Crispie and Ms. Laura Finnegan from the Teagasc Sequencing  
395 facility for their role in relation to the 16S rRNA sequencing. Funding for GLD, ACC, MSR, IGK, IDH  
396 and JMSC from the European Research Council under the European Union's Horizon 2020  
397 Programme (FP7/2007-2013)/ERC Consolidator Grant "Evoecocog" Project No. 617509, awarded to  
398 JLQ. This work was funded in part by Science Foundation Ireland through APC Microbiome Ireland.

399

#### 400 References

401

402 Amato K.R., Leigh S.R., Kent A., Mackie R.I., Yeoman C.J., Stumpf R.M., Wilson B.A., Nelson K.E.,  
403 White B.A. & Garber P.A. (2015). The Gut Microbiota Appears to Compensate for Seasonal Diet  
404 Variation in the Wild Black Howler Monkey (*Alouatta pigra*). *Microbial Ecology*, 69, 434-443.

405 Bates D., Maechler M., Bolker B. & Walker S. (2014). lme4: Linear mixed-effects models using Eigen  
406 and S4. In.

- 407 Bokulich N.A., Subramanian S., Faith J.J., Gevers D., Gordon J.I., Knight R., Mills D.A. & Caporaso J.G.  
408 (2013). Quality-filtering vastly improves diversity estimates from Illumina amplicon sequencing. *Nat*  
409 *Methods*, 2012/12/02, 57-59.
- 410 Bruce-Keller A.J., Salbaum J.M., Luo M., Blanchard E., IV, Taylor C.M., Welsh D.A. & Berthoud H.R.  
411 (2015). Obese-type Gut Microbiota Induce Neurobehavioral Changes in the Absence of Obesity.  
412 *Biological Psychiatry*, 77, 607-615.
- 413 Carlson A.L., Xia K., Azcarate-Peril M.A., Goldman B.D., Ahn M., Styner M.A., Thompson A.L., Geng X.,  
414 Gilmore J.H. & Knickmeyer R.C. (2018). Infant Gut Microbiome Associated With Cognitive-  
415 Development. *Biological Psychiatry*, 83, 148-159.
- 416 Clarke G., Grenham S., Scully P., Fitzgerald P., Moloney R.D., Shanahan F., Dinan T.G. & Cryan J.F.  
417 (2012). The microbiome-gut-brain axis during early life regulates the hippocampal serotonergic  
418 system in a sex-dependent manner. *Molecular Psychiatry*, 18, 666.
- 419 Clarke S.F., Murphy E.F., Sullivan O., Lucey A.J., Humphreys M., Hogan A., Hayes P., Reilly M., Jeffery  
420 I.B., Wood-Martin R., Kerins D.M., Quigley E., Ross R.P., Toole P.W., Molloy M.G., Falvey E.,  
421 Shanahan F. & Cotter P.D. (2014). Exercise and associated dietary extremes impact on gut microbial  
422 diversity. *Gut*, 63, 1913.
- 423 Cole E.F., Cram D.L. & Quinn J.L. (2011). Individual variation in spontaneous problem-solving  
424 performance among wild great tits. *Animal Behaviour*, 81, 491-498.
- 425 Cole E., Morand-Ferron J., Hinks A. & Quinn J. (2012). Cognitive Ability Influences Reproductive Life  
426 History Variation in the Wild. *Current Biology*, 22, 1808-1812.
- 427 Costa S., Lopes I., Proenca D.N., Ribeiro R. & Morais P.V. (2016). Diversity of cutaneous microbiome  
428 of *Pelophylax perezi* populations inhabiting different environments. *Science of The Total*  
429 *Environment*, 572, 995-1004.
- 430 Crouch N.M.A., Lynch V.M. & Clarke J.A. (2019). A re-evaluation of the chemical composition of avian  
431 urinary excreta. *Journal of Ornithology*.
- 432 Cryan J.F. & Dinan T.G. (2012). Mind-altering microorganisms: the impact of the gut microbiota on  
433 brain and behaviour. *Nature Reviews Neuroscience*, 13, 701.
- 434 Cryan J.F., O'Riordan K.J., Cowan C.S.M., Sandhu K.V., Bastiaansen T.F.S., Boehme M., Codagnone  
435 M.G., Cussotto S., Fulling C., Golubeva A.V., Guzzetta K.E., Jaggar M., Long-Smith C.M., Lyte J.M.,  
436 Martin J.A., Molinero-Perez A., Moloney G., Morelli E., Morillas E., O'Connor R., Cruz-Pereira J.S.,  
437 Peterson V.L., Rea K., Ritz N.L., Sherwin E., Spichak S., Teichman E.M., van de Wouw M., Ventura-  
438 Silva A.P., Wallace-Fitzsimons S.E., Hyland N., Clarke G. & Dinan T.G. (2019). The Microbiota-Gut-  
439 Brain Axis. *Physiological Reviews*, 99, 1877-2013.
- 440 David L.A., Maurice C.F., Carmody R.N., Gootenberg D.B., Button J.E., Wolfe B.E., Ling A.V., Devlin  
441 A.S., Varma Y., Fischbach M.A., Biddinger S.B., Dutton R.J. & Turnbaugh P.J. (2014). Diet rapidly and  
442 reproducibly alters the human gut microbiome. *Nature*, 505.
- 443 Davidson G.L., Cooke A.C., Johnson C.N. & Quinn J.L. (2018). The gut microbiome as a driver of  
444 individual variation in cognition and functional behaviour. *Philosophical Transactions of the Royal*  
445 *Society B: Biological Sciences*, 373, 20170286.

- 446 De Filippo C., Cavalieri D., Di Paola M., Ramazzotti M., Poullet J.B., Massart S., Collini S., Pieraccini G.  
447 & Lionetti P. (2010). Impact of diet in shaping gut microbiota revealed by a comparative study in  
448 children from Europe and rural Africa. *Proc Natl Acad Sci USA*, 107, 14691.
- 449 Desbonnet L., Clarke G., Shanahan F., Dinan T.G. & Cryan J.F. (2014). Microbiota is essential for social  
450 development in the mouse. *Molecular Psychiatry*, 19, 146-148.
- 451 Diaz Heijtz R., Wang S., Anuar F., Qian Y., Bjorkholm B., Samuelsson A., Hibberd M.L., Forssberg H. &  
452 Pettersson S. (2011). Normal gut microbiota modulates brain development and behavior. *Proc Natl*  
453 *Acad Sci USA*, 108, 3047-3052.
- 454 Ducatez S., Clavel J. & Lefebvre L. (2015). Ecological generalism and behavioural innovation in birds:  
455 technical intelligence or the simple incorporation of new foods? *J Anim Ecol*, 84, 79-89.
- 456 Dunn J.C., Cole E.F. & Quinn J.L. (2011). Personality and parasites: sex-dependent associations  
457 between avian malaria infection and multiple behavioural traits. *Behavioral Ecology and*  
458 *Sociobiology*, 65, 1459-1471.
- 459 Escallon C., Belden L.K. & Moore I.T. (2019). The Cloacal Microbiome Changes with the Breeding  
460 Season in a Wild Bird. *Integrative Organismal Biology*, 1.
- 461 Fava F., Gitau R., Griffin B.A., Gibson G.R., Tuohy K.M. & Lovegrove J.A. (2013). The type and quantity  
462 of dietary fat and carbohydrate alter faecal microbiome and short-chain fatty acid excretion in a  
463 metabolic syndrome ΓÇÿat-riskΓÇÖ population. *International Journal of Obesity*, 37, 216-223.
- 464 Foster J.A. & McVey Neufeld K.A. (2013). Gut-brain axis: how the microbiome influences anxiety and  
465 depression. *Trends in Neurosciences*, 36, 305-312.
- 466 Fouhy F., Watkins C., Hill C.J., OΓÇÖShea C.A., Nagle B., Dempsey E.M., OΓÇÖToole P.W., Ross R.P.,  
467 Ryan C.A. & Stanton C. (2019). Perinatal factors affect the gut microbiota up to four years after birth.  
468 *Nature Communications*, 10, 1517.
- 469 Gareau M.G., Wine E., Rodrigues D.M., Cho J.H., Whary M.T., Philpott D.J., MacQueen G. & Sherman  
470 P.M. (2011). Bacterial infection causes stress-induced memory dysfunction in mice. *Gut*, 60, 307.
- 471 Gillingham M.A.F., Bechet A., Cezilly F., Wilhelm K., Rendon-Martos M., Borghesi F., Nissardi S.,  
472 Baccetti N., Azafzaf H., Menke S., Kayser Y. & Sommer S. (2019). Offspring Microbiomes Differ Across  
473 Breeding Sites in a Panmictic Species. *Frontiers in Microbiology*, 10, 35.
- 474 Griffin A.S. & Guez D. (2014). Innovation and problem solving: A review of common mechanisms.  
475 *Behavioural Processes*, 109, 121-134.
- 476 Heintz-Buschart A. & Wilmes P. (2018). Human Gut Microbiome: Function Matters. *Trends in*  
477 *Microbiology*, 26, 563-574.
- 478 Hicks A.L., Lee K.J., Couto-Rodriguez M., Patel J., Sinha R., Guo C., Olson S.H., Seimon A., Seimon T.A.,  
479 Ondzie A.U., Karesh W.B., Reed P., Cameron K.N., Lipkin W.I. & Williams B.L. (2018). Gut  
480 microbiomes of wild great apes fluctuate seasonally in response to diet. *Nature Communications*, 9,  
481 1786.
- 482 Hird S.M., Sanchez C., Carstens B.C. & Brumfield R.T. (2015). Comparative Gut Microbiota of 59  
483 Neotropical Bird Species. *Front Microbiol*, 6, 1403.

- 484 Hoban A.E., Stilling R.M., Moloney G., Shanahan F., Dinan T.G., Clarke G. & Cryan J.F. (2017). The  
485 microbiome regulates amygdala-dependent fear recall. *Molecular Psychiatry*.
- 486 Khan G., Kangro H.O., Coates P.J. & Heath R.B. (1991). Inhibitory effects of urine on the polymerase  
487 chain reaction for cytomegalovirus DNA. *J Clin Pathol*, 44, 360-365.
- 488 Knutie S.A., Chaves J.A. & Gotanda K.M. (2019). Human activity can influence the gut microbiota of  
489 Darwin's finches in the Galapagos Islands. *Mol Ecol*, 28, 2441-2450.
- 490 Kropackova L., Tesicky M., Albrecht T., Kubovciak J., Cizkova D., Tomasek O., Martin J., Bobek L.,  
491 Kreisinger T., Prochazka P. & Kreisinger J. (2017). Codiversification of gastrointestinal microbiota and  
492 phylogeny in passerines is not explained by ecological divergence. *Mol Ecol*, 26, 5292-5304.
- 493 Kuznetsova A., Brockhoff P.B. & Christensen R.H.B. (2017). lmerTest Package: Tests in Linear Mixed  
494 Effects Models. *Journal of Statistical Software; Vol 1, Issue 13 (2017)*.
- 495 Ley R.E., Hamady M., Lozupone C., Turnbaugh P.J., Ramey R.R., Bircher J.S., Schlegel M.L., Tucker  
496 T.A., Schrenzel M.D., Knight R. & Gordon J.I. (2008). Evolution of Mammals and Their Gut Microbes.  
497 *Science*, 320, 1647.
- 498 Li W., Dowd S.E., Scurlock B., Acosta-Martinez V. & Lyte M. (2009). Memory and learning behavior in  
499 mice is temporally associated with diet-induced alterations in gut bacteria. *Physiology & Behavior*,  
500 96, 557-567.
- 501 Lozupone C.A., Stombaugh J.I., Gordon J.I., Jansson J.K. & Knight R. (2012). Diversity, stability and  
502 resilience of the human gut microbiota. *Nature*, 489, 220.
- 503 Magnusson K.R., Hauck L., Jeffrey B.M., Elias V., Humphrey A., Nath R., Perrone A. & Bermudez L.E.  
504 (2015). Relationships between diet-related changes in the gut microbiome and cognitive flexibility.  
505 *Neuroscience*, 300, 128-140.
- 506 Maurice C.F., CL Knowles S., Ladau J., Pollard K.S., Fenton A., Pedersen A.B. & Turnbaugh P.J. (2015).  
507 Marked seasonal variation in the wild mouse gut microbiota. *The Isme Journal*, 9, 2423.
- 508 Mohle L., Mattei D., Heimesaat M., Bereswill S., Fischer A., Alutis M., French T., Hambardzumyan D.,  
509 Matzinger P., Dunay I. & Wolf S. (2016). Ly6C-hi- Monocytes Provide a Link between Antibiotic-  
510 Induced Changes in Gut Microbiota and Adult Hippocampal Neurogenesis. *Cell Reports*, 15, 1945-  
511 1956.
- 512 Morand-Ferron J., Cole E.F. & Quinn J.L. (2016). Studying the evolutionary ecology of cognition in the  
513 wild: a review of practical and conceptual challenges. *Biol Rev*, 91, 367-389.
- 514 Muegge B.D., Kuczynski J., Knights D., Clemente J.C., González A., Fontana L., Henrissat B., Knight R.  
515 & Gordon J.I. (2011). Diet Drives Convergence in Gut Microbiome Functions Across Mammalian  
516 Phylogeny and Within Humans. *Science*, 332, 970.
- 517 O'Shea W., Serrano-Davies E., Quinn J.L. & Pruitt J. (2017). Do personality and innovativeness  
518 influence competitive ability? An experimental test in the great tit. *Behavioral Ecology*, 28, 1435-  
519 1444.
- 520 Ogbonnaya E.S., Clarke G., Shanahan F., Dinan T.G., Cryan J.F. & O'Leary O.F. (2015). Adult  
521 Hippocampal Neurogenesis Is Regulated by the Microbiome. *Biological Psychiatry*, 78, e7-e9.

- 522 Overington S.E., Griffin A.S., Sol D. & Lefebvre L. (2011). Are innovative species ecological  
523 generalists? A test in North American birds. *Behavioral Ecology*, 22, 1286-1293.
- 524 Pagani-Nunez E., Valls M. & Senar J.C. (2015). Diet specialization in a generalist population: the case  
525 of breeding great tits *Parus major* in the Mediterranean area. *Oecologia*, 179, 629-640.
- 526 Pan D. & Yu Z. (2014). Intestinal microbiome of poultry and its interaction with host and diet. *Gut*  
527 *Microbes*, 5, 108-119.
- 528 Perrins C. (1991). Tits and their caterpillar food supply. *Ibis*, 133, 49-54.
- 529 Psaltopoulou T., Sergentanis T.N., Panagiotakos D.B., Sergentanis I.N., Kostis R. & Scarmeas N. (2013).  
530 Mediterranean diet, stroke, cognitive impairment, and depression: A meta-analysis. *Ann Neurol.*, 74,  
531 580-591.
- 532 Quinn J.L., Cole E.F., Reed T.E. & Morand-Ferron J. (2016). Environmental and genetic determinants  
533 of innovativeness in a natural population of birds. *Philos Trans R Soc Lond B Biol Sci*, 371, 20150184.
- 534 R Development Core Team (2011). R: a language and environment for statistical computing. In: R  
535 Foundation for Statistical Computing, Vienna, Austria.
- 536 Reader S.M. & Laland K.N. (2003). Animal innovation: An introduction. In: *Animal innovation* Oxford  
537 University Press, New York, NY, US, pp. 3-35.
- 538 Reader S.M. & MacDonald K. (2003). Environmental variability and primate behavioural flexibility. In:  
539 *Animal innovation* Oxford University Press, New York, NY, US, pp. 83-116.
- 540 Roager H.M. & Dragsted L.O. (2019). Diet-derived microbial metabolites in health and disease. *Nutr*  
541 *Bull*, 44, 216-227.
- 542 Serrano-Davies E., O'Shea W. & Quinn J.L. (2017). Individual foraging preferences are linked to  
543 innovativeness and personality in the great tit. *Behavioral Ecology and Sociobiology*, 71, 161.
- 544 Sherwin E., Bordenstein S.R., Quinn J.L., Dinan T.G. & Cryan J.F. (2019). Microbiota and the social  
545 brain. *Science*, 366, eaar2016.
- 546 Singh R.K., Chang H.W., Yan D., Lee K.M., Ucmak D., Wong K., Abrouk M., Farahnik B., Nakamura M.,  
547 Zhu T.H., Bhutani T. & Liao W. (2017). Influence of diet on the gut microbiome and implications for  
548 human health. *Journal of Translational Medicine*, 15, 73.
- 549 Sol D., Duncan R.P., Blackburn T.M., Cassey P. & Lefebvre L. (2005). Big brains, enhanced cognition,  
550 and response of birds to novel environments. *Proc Natl Acad Sci U S A*, 102, 5460.
- 551 Stephens D.W. & Krebs J.K. (1986). *Foraging Theory*. Princeton University Press, Princeton, New  
552 Jersey.
- 553 Stilling R.M., van de Wouw M., Clarke G., Stanton C., Dinan T.G. & Cryan J.F. (2016). The  
554 neuropharmacology of butyrate: The bread and butter of the microbiota-gut-brain axis?  
555 *Neurochemistry International*, 99, 110-132.
- 556 Sullam K.E., Essinger S.D., Lozupone C.A., O'Connor M.P., Rosen G.L., Knight R., Kilham S.S. & Russell  
557 J.A. (2012). Environmental and ecological factors that shape the gut bacterial communities of fish: a  
558 meta-analysis. *Mol Ecol*, 2012/04/04, 3363-3378.

- 559 Svensson L. (1992). *Identification guide to European passerines*. British Trust for Ornithology,  
560 Thetford, United Kingdom.
- 561 Teyssier A., Rouffaer L.O., Saleh Hudin N., Strubbe D., Matthysen E., Lens L. & White J.I. (2018).  
562 Inside the guts of the city: Urban-induced alterations of the gut microbiota in a wild passerine.  
563 *Science of The Total Environment*, 612, 1276-1286.
- 564 Vel'ky M., Kanuch P. & Kristin A. (2011). Food composition of wintering great tits (*Parus major*):  
565 habitat and seasonal aspects. *2011*, 60, 228-236.
- 566 Wu G.D., Compher C., Chen E.Z., Smith S.A., Shah R.D., Bittinger K., Chehoud C., Albenberg L.G.,  
567 Nessel L., Gilroy E., Star J., Weljie A.M., Flint H.J., Metz D.C., Bennett M.J., Li H., Bushman F.D. &  
568 Lewis J.D. (2016). Comparative metabolomics in vegans and omnivores reveal constraints on diet-  
569 dependent gut microbiota metabolite production. *Gut*, 65, 63.
- 570 Youngblut N.D., Reischer G.H., Walters W., Schuster N., Walzer C., Stalder G., Ley R.E. & Farnleitner  
571 A.H. (2019). Host diet and evolutionary history explain different aspects of gut microbiome diversity  
572 among vertebrate clades. *Nature Communications*, 10, 2200.
- 573 Zakrzewski M., Proietti C., Ellis J.J., Hasan S., Brion M.J., Berger B. & Krause L. (2017). Calypso: a user-  
574 friendly web-server for mining and visualizing microbiome-environment interactions. *Bioinformatics*,  
575 33, 782-783.
- 576 Zeale M.R.K., Butlin R.K., Barker G.L.A., Lees D.C. & JONES G.A.R.E. (2011). Taxon-specific PCR for  
577 DNA barcoding arthropod prey in bat faeces. *Mol Ecol Resour*, 11, 236-244.
- 578 Zimmer J., Lange B., Frick J.S., Sauer H., Zimmermann K., Schwiertz A., Rusch K., Klosterhalfen S. &  
579 Enck P. (2012). A vegan or vegetarian diet substantially alters the human colonic faecal microbiota.  
580 *European Journal of Clinical Nutrition*, 66, 53-60.  
581  
582  
583  
584  
585  
586  
587  
588  
589  
590  
591  
592  
593

594 FIGURES

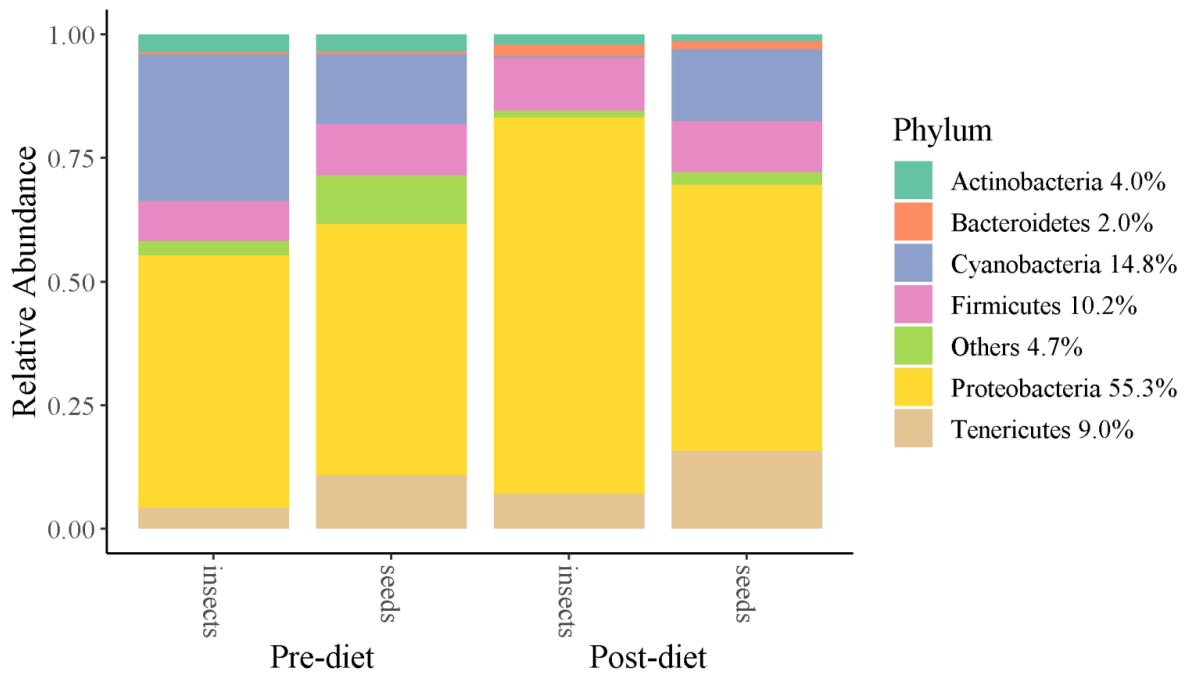

595

596 Figure 1. Relative abundance of top seven phyla across dietary treatments. Percentages reflect  
597 overall abundance, independent of treatment groups.

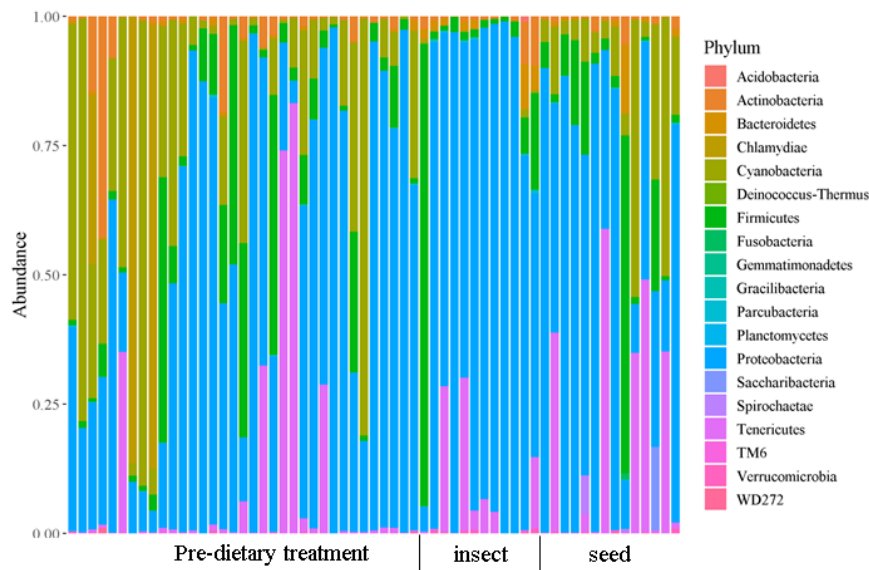

598

599 Figure 2. Differential abundance of all phyla per individual sample pre and post-insect and post-seed  
600 dietary treatments.



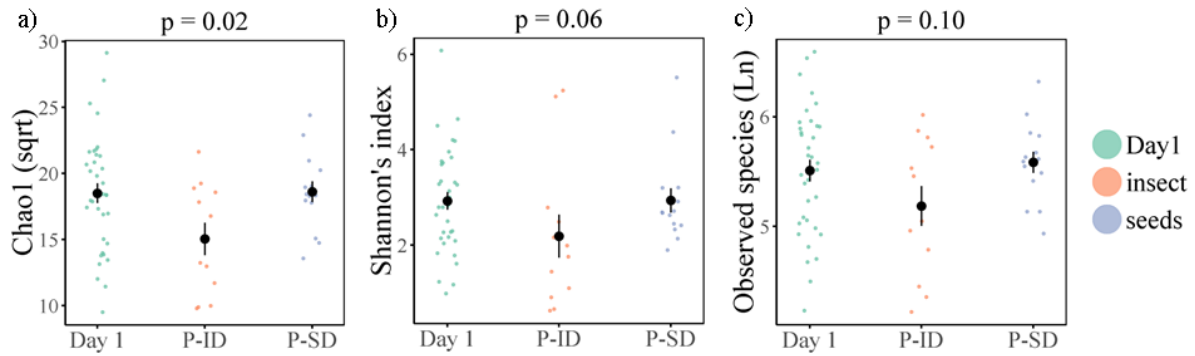

601

602 Figure 3. Alpha diversity for birds pre-dietary assignment (Day 1), post-insect diet and post-seed diet  
603 for a) Chao1 (sqrt), b) Shannon's index, c) Observed species (Ln). Coloured points denote individual  
604 data points, black points and line denote mean and  $\pm$  SE. p values represent the comparison  
605 between post-insect diet group and day 1.

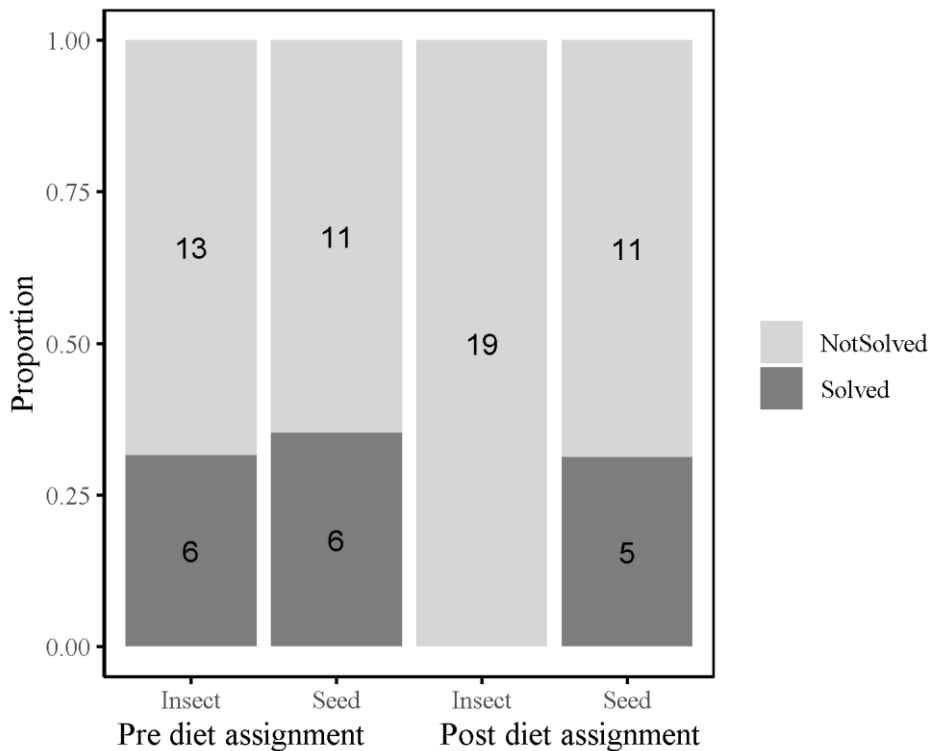

606

607 Figure 4. Problem solving performance as a measure of innovation. Number of individuals that  
608 solved (dark grey) and number of birds that did not solve (light grey) pre- and post- dietary  
609 treatments.

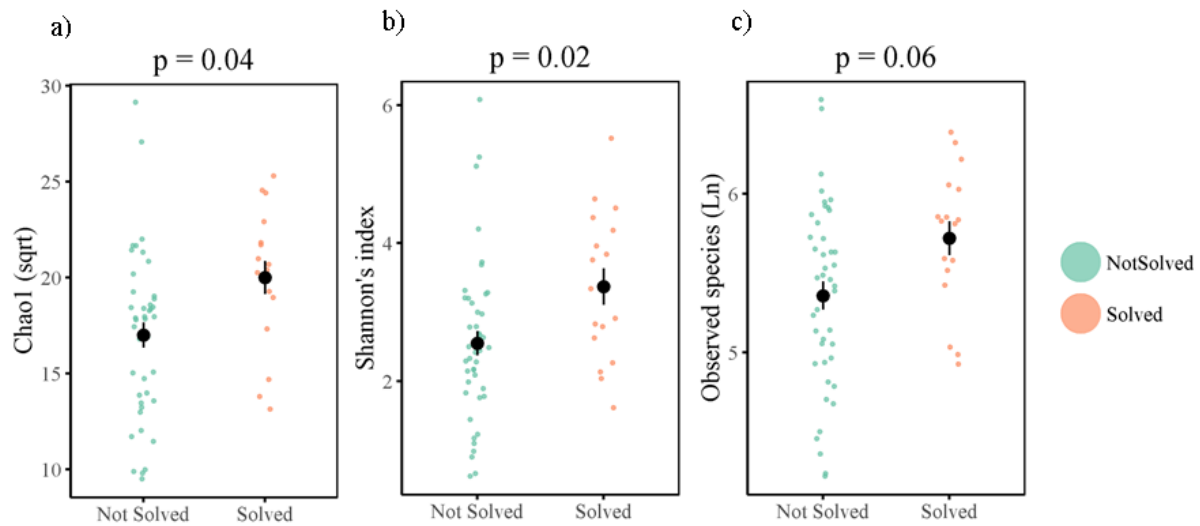

610

611 Figure 5. Problem solving-alpha diversity relationships in a) Chao1 (sqrt), b) Shannon's index, c)  
612 Observed species (Ln) including data points from both day 1 and day 12. Coloured points denote  
613 individual data points, black points and line denote mean and  $\pm$  SE.

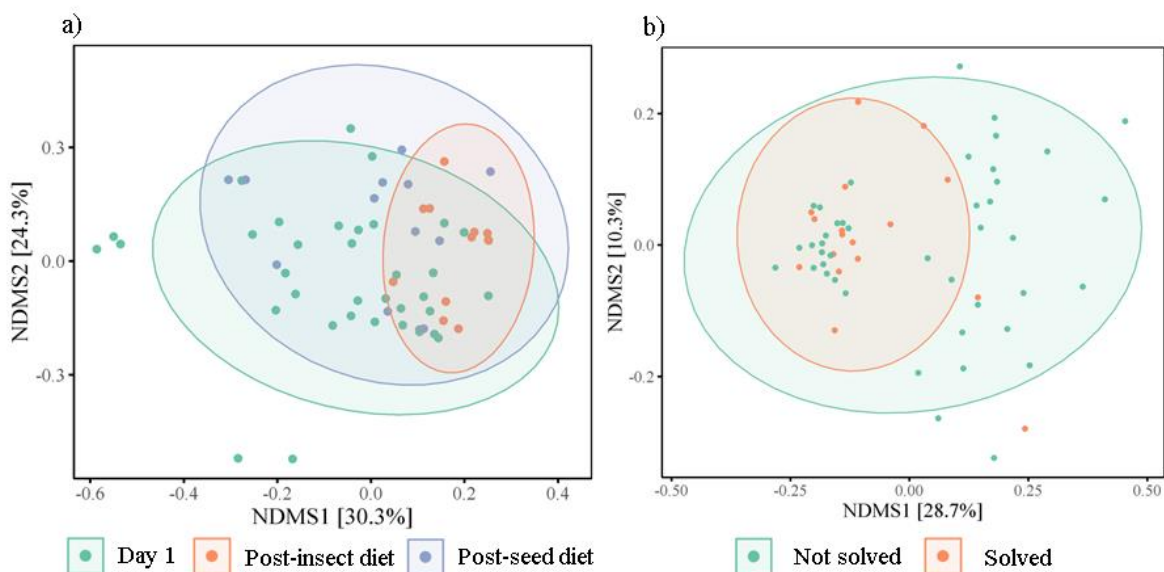

614

615 Figure 6. Nonmetric Multidimensional Scaling (NMDS) ordination plots based on (a) weighted unfrac  
616 distances of diet and experiment day, and (b) unweighted unfrac distances of problem solving  
617 performance. Ellipses represent standard deviations around the centroids of the groups. Numbers in  
618 brackets refer to the variance explained by NDMS axes.

619

620

621

622
